# Supplementary material for: Clinical features of patients with small cell lung cancer and idiopathic pulmonary fibrosis treated with chemotherapy or chemoradiotherapy
Source: PubMed Central journal article supplement — Ther Adv Respir Dis. 2020 Oct 21;14:1753466620963866. doi: 10.1177/1753466620963866 (PMC7586036; doi:10.1177/1753466620963866), 2020-10-21
Supplement: Reviewer_1_v.1.pdf [file Reviewer_1_v.1.pdf]

Reviewer 1 v.1

Comments to the Author

In the present study, Kanaji et al perform a retrospective analysis of the outcome of SCLC patients in relation to the diagnosis of ILD.

Even if the sample size is considerable, this study is not unique (see the list of missing references below), and confirms previous findings. In addition, the major limitation is the diagnosis of ILD, which was solely based on radiological features at HRCT

Table 1. the mean DLCO in patients with ILD was similar to non-ILD cases, which is very strange. In addition, the values are very high (ca 76-78%). How do the Au explain this finding?

Thoracic radiotherapy is usually discouraged in patients with ILD. What radiation doses did the patients with LD receive? What was the toxicity profile in the patients treated with radiotherapy, according to the ILD status?

The discussion should be shortened, and the results of the current study should be put more in context with the results from other experiences.

The following references are missing

PMID 31186636

PMID: 31874284

PMID: 31442290
