# Supplementary material for: Clinical features of patients with small cell lung cancer and idiopathic pulmonary fibrosis treated with chemotherapy or chemoradiotherapy
Source: PubMed Central journal article supplement — Ther Adv Respir Dis. 2020 Oct 21;14:1753466620963866. doi: 10.1177/1753466620963866 (PMC7586036; doi:10.1177/1753466620963866), 2020-10-21
Supplement: Reviewer_3_v.2.pdf [file Reviewer_3_v.2.pdf]

Reviewer 3 v.2

Comments to the Author

Thank you for addressing all previous revisions. After reviewing your study I have a few comments/ revision requests:

1. Introduction - line 38 " The right or wrong ..." this sentence needs rephrasing or splitting into 2 sentences
2. Introduction- line 47-54 all this paragraph needs rephrasing as it is too long and too complicated , grammar needs correction
3. Patients and Methods -Evaluation of ILD - line 15 - why NSIP and OP were excluded from being considered ILD
4. Results- Line 28- significantly older - please add a p value
5. Response to chemotherapy - This paragraph needs line separation when you write about LD and than about ED, it will help the reader to understand what you mean to say
6. Response to chemotherapy- line 15-17 "Of the IPF .." this sentence needs rephrasing and clarification . What is the meaning of less than 3 cycles - is it the cause / an effect ?
7. Page 7 Title " Shorter PFS ..." The word Shorter is redundant
8. Page 7 line 47 : The Kaplan Meier curves illustrate..." add the Fig number or remove this part
9. Page 7-8 sentence "Similarly ..." remove brackets , break this informative long sentence into 2 sentences which are simpler and easier to understand.
10. Page 8 sentence " The multivariate ..." remove the word "The" and the word "only"
11. Page 9 sentence " Here, large scale ..." rephrase this sentence
12. How was the " response rate to chemotherapy " defined - needs definition added to Patients and Methods section
13. Page 9 line 35- 36 "...which is also the first report." What does this part relate to . Needs to be edited .
14. Page 10 lines 49-54 the sentence " This finding is from..." is redundant the following sentence " However this result..." needs clarification and editing
15. Page 11 Limitation number 3 - what are you saying ? Is this a Result or a limitation ? The sentence "In idiopathic interstitial pneumonia ..." is part of discussion and does not belong to the limitation paragraph.
16. References- please review order and significance , for instance - what is the need for reference 14 and 19 together?
