# Supplementary material for: Clinical features of patients with small cell lung cancer and idiopathic pulmonary fibrosis treated with chemotherapy or chemoradiotherapy
Source: PubMed Central journal article supplement — Ther Adv Respir Dis. 2020 Oct 21;14:1753466620963866. doi: 10.1177/1753466620963866 (PMC7586036; doi:10.1177/1753466620963866), 2020-10-21
Supplement: Supplementary_Table_S1.pdf [file Supplementary_Table_S1.pdf]

Supplementary Table S1. Reasons for discontinuation of first-line chemotherapy within three cycles

| Characteristics                                        | All patients<br>(n=366) | Non-ILD<br>(n=269) | IPF (n=75) | <i>P</i> value (IPF vs.<br>non-ILD) |
|--------------------------------------------------------|-------------------------|--------------------|------------|-------------------------------------|
| Number of cycles of chemotherapy, average (range)      | 4 (1-6)                 | 4 (1-6)            | 3 (1-6)    | 0.0352                              |
| Number of patients who received fewer than four cycles | 103 (28%)               | 64 (24%)           | 29 (39%)   | 0.0120                              |
| Reasons of discontinuation                             |                         |                    |            |                                     |
| PD                                                     | 37 (36%)                | 23 (36%)           | 10 (34%)   | 1.0000                              |
| Deterioration in PS                                    | 19 (18%)                | 14 (22%)           | 3 (10%)    | 0.2511                              |
| Adverse events                                         | 26 (25%)                | 14 (22%)           | 10 (34%)   | 0.2112                              |
| Infection                                              | 7                       | 4                  | 2          |                                     |
| Acute exacerbation of IPF                              | 3                       | 0                  | 3          |                                     |
| Others                                                 | 7 (7%)                  | 5 (8%)             | 1 (3%)     | 0.6616                              |
| Unknown                                                | 14 (14%)                | 8 (13%)            | 5 (17%)    | 0.5348                              |

ILD: interstitial lung disease, IPF: idiopathic pulmonary fibrosis, PD: progressive disease, PS: performance status
